# Supplementary material for: Nutrient Deficiency Tolerance in Citrus Is Dependent on Genotype or Ploidy Level
Source: PubMed Central journal article supplement (PMC6396732; doi:10.3389/fpls.2019.00127), 2019-02-11

**Figure S4:** Biplot obtained from principal component analysis (PCA) performed after (A and B) 70 and (C and D) 140 days of total nutrient deficiency in leaves of the nine genotypes, (A and C) dispersion of genotypes and (B and D) contribution of the variables to the dispersion. The variables analyzed are net photosynthesis rate ( $P_{net}$ ), stomatal conductance ( $G_s$ ), chlorophyll fluorescence ( $F_v/F_m$ ), malondialdehyde (MDA), hydrogen peroxide ( $H_2O_2$ ), antioxidant enzymes (SOD, CAT, APX and DHAR), reduced ascorbate (Asa), oxidized ascorbate (DHA), total ascorbate (tAsa), ascorbate redox status (Asa/DHA) and proline.

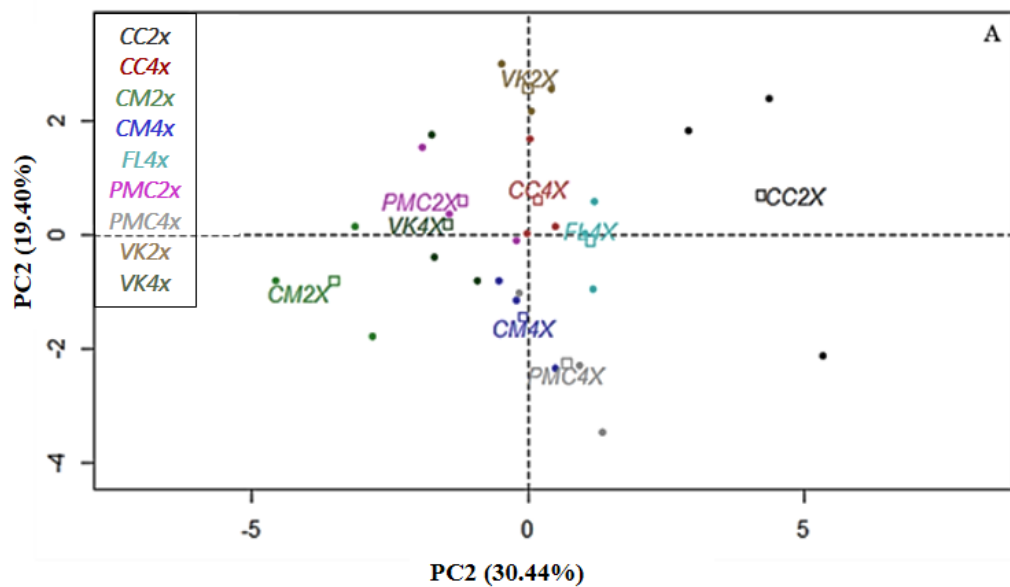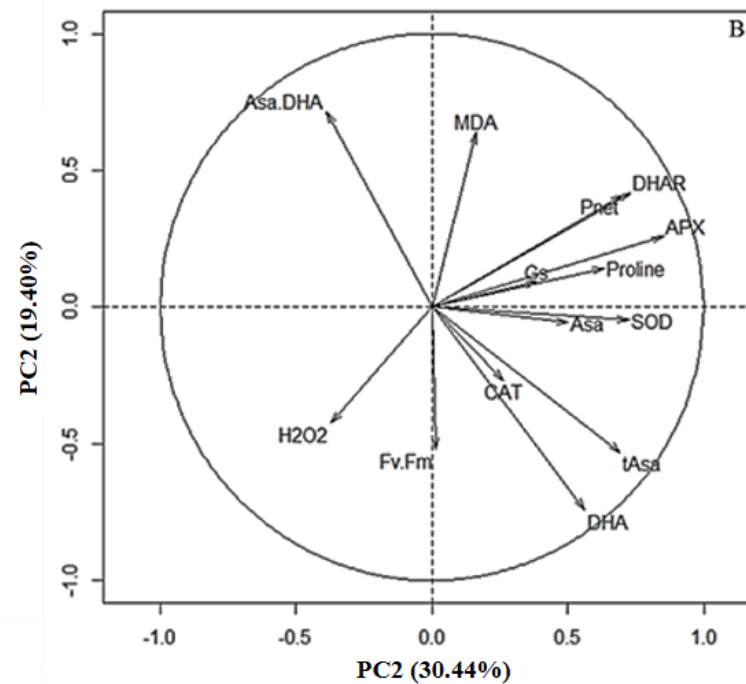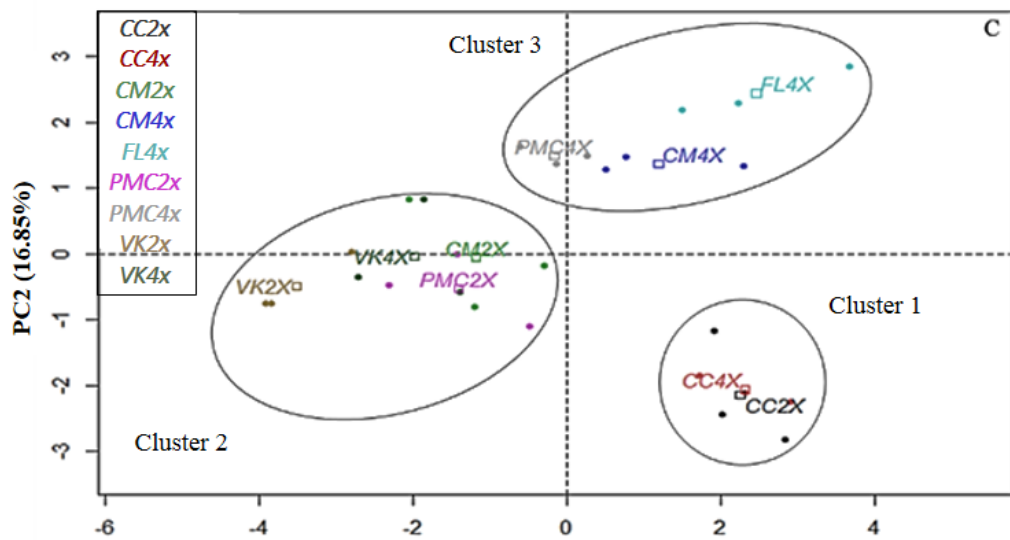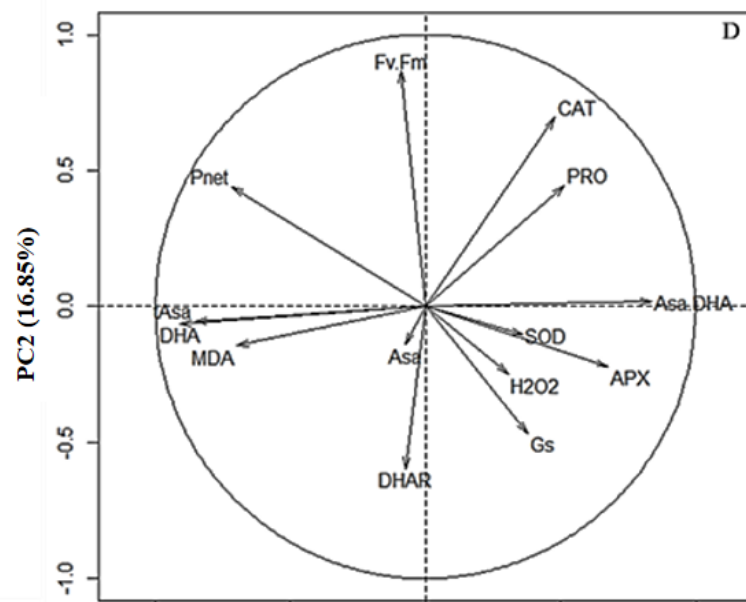

Supplement: Image_4.pdf [file Image_4.pdf]
