# Supplementary material for: Nutrient Deficiency Tolerance in Citrus Is Dependent on Genotype or Ploidy Level
Source: PubMed Central journal article supplement (PMC6396732; doi:10.3389/fpls.2019.00127), 2019-02-11
Supplement: Table_1.pdf [file Table_1.pdf]

**Table S1.** Evolution of branches length, trunk diameter and leaf area, throughout the nutrient deficiency in leaves of 2x and 4x seedlings.

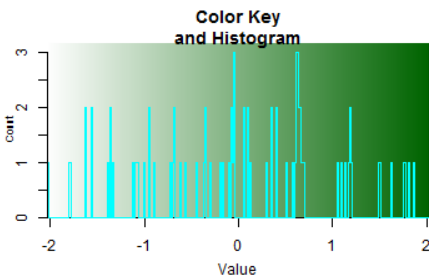

| Genotype | Date | Branches length (cm) | Trunk diameter (cm) | Leaf area (cm) |
|----------|------|----------------------|---------------------|----------------|
| VK2x     | D0   | 27.00                | 17.53               | 6.33           |
|          | D210 | 58.96                | 21.02               | 10.07          |
|          | 30DR | 59.29                | 22.59               | 10.35          |
| VK4x     | D0   | 43.19                | 15.23               | 5.72           |
|          | D210 | 90.61                | 18.90               | 10.01          |
|          | 30DR | 91.20                | 18.60               | 10.79          |
| PMC2x    | D0   | 71.06                | 15.38               | 4.79           |
|          | D210 | 103.18               | 20.67               | 2.52           |
| PMC4x    | D0   | 52.98                | 13.60               | 4.02           |
|          | D210 | 92.24                | 14.75               | 5.60           |
| FL4x     | D0   | 43.19                | 12.95               | 3.23           |
|          | D210 | 90.61                | 14.07               | 2.52           |
|          | 30DR | 91.20                | 14.91               | 2.67           |
| CC2x     | D0   | 71.80                | 16.59               | 5.07           |
|          | D210 | 92.06                | 18.77               | 5.60           |
|          | 30DR | 104.70               | 18.77               | 5.56           |
| CC4x     | D0   | 74.74                | 17.94               | 6.56           |
|          | D210 | 118.54               | 19.51               | 6.72           |
|          | 30DR | 120.20               | 20.77               | 6.67           |
| CM2x     | D0   | 49.58                | 15.85               | 6.66           |
|          | D210 | 74.10                | 21.02               | 7.95           |
|          | 30DR | 74.39                | 21.00               | 7.97           |
| CM4x     | D0   | 49.44                | 16.16               | 7.66           |
|          | D210 | 74.06                | 18.90               | 7.83           |
|          | 30DR | 74.64                | 19.61               | 7.91           |

Growth parameters were measured after different period of nutrient deficiency: days 0 (D0) for the control and 210 (D210) and after 30 days of recovery (30DR). The results are presented as mean of 12 independent measurements ( $n = 12$ ) for branches length and leaf area and 3 independent measurement ( $n = 3$ ) for trunk diameter. The heat map shows the differences between genotypes, ploidy level and treatments for each growth parameters. Values are associated with color ranging from white (low) to dark green (high).
