# Supplementary material for: Nutrient Deficiency Tolerance in Citrus Is Dependent on Genotype or Ploidy Level
Source: PubMed Central journal article supplement (PMC6396732; doi:10.3389/fpls.2019.00127), 2019-02-11
Supplement: Table_2.pdf [file Table_2.pdf]

**Table S2.** Total content of iron (Fe), manganese (Mn), copper (Cu), zinc (Zn) and boron (B), throughout the nutrient deficiency in leaves of 2x and 4x genotypes.

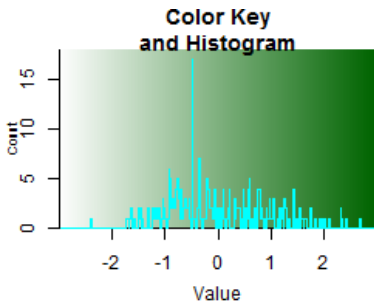

| Genotype | Date | Fe ppm  | Mn ppm  | Cu ppm | Zn ppm | B ppm  |
|----------|------|---------|---------|--------|--------|--------|
| VK2x     | D0   | 192.050 | 77.900  | 6.200  | 25.150 | 48.250 |
|          | D210 | 92.600  | 28.500  | 1.450  | 15.750 | 37.050 |
|          | 30DR | 75.550  | 23.650  | 1.700  | 19.650 | 34.950 |
| VK4x     | D0   | 216.300 | 24.400  | 2.400  | 9.250  | 26.200 |
|          | D210 | 78.450  | 80.800  | 7.500  | 18.450 | 44.550 |
|          | 30DR | 83.600  | 17.200  | 3.900  | 16.300 | 25.600 |
| PMC2x    | D0   | 234.700 | 84.400  | 7.550  | 12.450 | 33.250 |
|          | D210 | 43.850  | 13.800  | 0.200  | 9.050  | 19.150 |
| PMC4x    | D0   | 175.900 | 76.950  | 6.900  | 20.900 | 27.600 |
|          | D210 | 77.800  | 31.950  | 2.200  | 14.700 | 18.150 |
| FL4x     | D0   | 153.800 | 104.900 | 7.200  | 10.400 | 28.350 |
|          | D210 | 57.200  | 22.867  | 2.233  | 10.900 | 25.167 |
|          | 30DR | 145.250 | 29.050  | 4.550  | 16.300 | 18.100 |
| CC2x     | D0   | 178.850 | 70.250  | 7.900  | 21.350 | 13.900 |
|          | D210 | 129.800 | 30.750  | 4.000  | 9.750  | 21.150 |
|          | 30DR | 103.950 | 36.150  | 2.000  | 11.950 | 31.300 |
| CC4x     | D0   | 213.550 | 70.350  | 7.900  | 28.800 | 27.050 |
|          | D210 | 166.600 | 25.200  | 5.100  | 19.100 | 18.400 |
|          | 30DR | 61.950  | 22.050  | 3.450  | 18.350 | 16.300 |
| CM2x     | D0   | 153.550 | 57.350  | 7.450  | 21.650 | 41.500 |
|          | D210 | 131.100 | 22.150  | 2.900  | 11.900 | 37.350 |
|          | 30DR | 80.650  | 17.150  | 2.400  | 18.950 | 17.650 |
| CM4x     | D0   | 118.500 | 37.050  | 6.500  | 22.900 | 53.100 |
|          | D210 | 75.500  | 8.800   | 1.200  | 15.600 | 29.800 |
|          | 30DR | 91.050  | 16.000  | 2.350  | 15.400 | 31.400 |

Contents were measured after different period of nutrient deficiency: days 0 (D0) for the control and 210 (D210) and after 30 days of recovery (30DR). The results are presented as mean of 3 independent measurements ( $n = 3$ ). The heat map shows the differences between genotypes, ploidy level and treatments for each micronutrient. Values are associated with color ranging from white (low) to dark green (high).
